# Supplementary material
Source: PubMed Central journal article supplement (PMC3562392)
Supplement: NIHMS377687-supplement-3_si_003.pdf [file NIHMS377687-supplement-3_si_003.pdf]

Table 1. Histopathological diagnosis of human cancer biopsies.

| <b>PATIENT</b><br>(H= healthy; P= pathological) | <b>DIAGNOSIS</b>                         |
|-------------------------------------------------|------------------------------------------|
| Pt1 (AH-AP)                                     | Invasive ductal carcinoma G3, score<br>9 |
| Pt2 (BH-BP)                                     | Invasive ductal carcinoma G2, score<br>7 |
| Pt3 (CH-CP)                                     | Phylloides Tumor                         |

Table 2. Scheme of Tandem mass Tags labeling.

| <b>TmT</b> | <b>Sample: Fluids lysates</b> | <b>Sample: Cells lysates</b> |
|------------|-------------------------------|------------------------------|
| 126        | AH1                           | BH2                          |
| 127        | AP1                           | BP2                          |
| 128        | BH1                           | AH2                          |
| 129        | BP1                           | AP2                          |
| 130        | CH1                           | CH2                          |
| 131        | CP1                           | CP2                          |

Table 3. MudPIT gradient elution profile.

Cycle1

| Time   | Flow (ml/min) | A%  | B%  | C% |
|--------|---------------|-----|-----|----|
| 0.00   | 0.150         | 100 | -   | -  |
| 0.99   | 0.150         | 100 | -   | -  |
| 1.00   | 0.150         | 100 | -   | -  |
| 5.00   | 0.150         | 100 | -   | -  |
| 5.01   | 0.150         | 100 | -   | -  |
| 10.00  | 0.150         | 90  | 10  | -  |
| 90.00  | 0.150         | 50  | 50  | -  |
| 100.00 | 0.150         | 0   | 100 | -  |
| 110.00 | 0.150         | 0   | 100 | -  |
| 111.00 | 0.150         | 100 | -   | -  |
| 120.00 | 0.150         | 100 | -   | -  |
| 121.00 | 0.150         | 100 | -   | -  |

Cycle 2-9:

| Time | Flow (ml/min) | A%                          | B% | C%                           |
|------|---------------|-----------------------------|----|------------------------------|
| 0.00 | 0.150         | 100                         | 0  | -                            |
| 0.99 | 0.150         | 100                         | 0  | -                            |
| 1.00 | 0.150         | 90, 80,70,60,<br>50,40,30,0 | 0  | 10,20,30,40,50,<br>60,70,100 |
| 5.00 | 0.150         | 90, 80,70,60,<br>50,40,30,0 | 0  | 10,20,30,40,50,<br>60,70,100 |

|        |       |     |     |   |
|--------|-------|-----|-----|---|
| 5.01   | 0.150 | 100 | 0   | - |
| 10.00  | 0.150 | 90  | 10  | - |
| 90.00  | 0.150 | 50  | 50  | - |
| 100.00 | 0.150 | 0   | 100 | - |
| 110.00 | 0.150 | 0   | 100 | - |
| 111.00 | 0.150 | 100 | 0   | - |
| 120.00 | 0.150 | 100 | 0   | - |
| 121.00 | 0.150 | 100 | 0   | - |

Cycle 10-11

| Time   | Flow (ml/min) | A%  | B%  | C% |
|--------|---------------|-----|-----|----|
| 0.00   | 0.150         | 100 | 0   | -  |
| 0.99   | 0.150         | 100 | 0   | -  |
| 1.00   | 0.150         | 0   | 10  | 90 |
| 5.00   | 0.150         | 0   | 10  | 90 |
| 5.01   | 0.150         | 100 | 0   | -  |
| 10.00  | 0.150         | 90  | 10  | -  |
| 90.00  | 0.150         | 50  | 50  | -  |
| 100.00 | 0.150         | 0   | 100 | -  |
| 110.00 | 0.150         | 0   | 100 | -  |
| 111.00 | 0.150         | 100 | 0   | -  |
| 120.00 | 0.150         | 100 | 0   | -  |
| 121.00 | 0.150         | 100 | 0   | -  |
